# Supplementary material for: An Increase in the Prevalence of Clinically-Relevant Resistance-Associated Substitutions in Four Direct-Acting Antiviral Regimens: A Study Using GenBank HCV Sequences
Source: Preprints.org preprint supplement (doi:10.20944/preprints202407.0005.v1), 2024-07-01

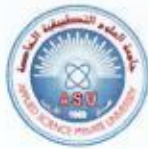

ASU  
جامعة العلوم التطبيقية الخاصة  
Applied Science Private University

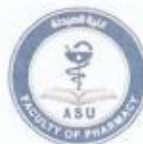

FOP  
كلية الصيدلة  
FACULTY OF PHARMACY

جامعة كل العرب

## INSTITUTIONAL REVIEW BOARD (IRB)

20/May./2024

### Letter for IRB Protocol Approval

**Approval Number:** 2024-PHA-19

**Research Title:** Hepatitis C virus resistance to direct-acting antivirals: Sequence analysis using GenBank.

**Investigators:** Roa'a Khalil, Malik Sallam, Muna Barakat.

Dear investigators,

The institutional review board in the faculty of pharmacy- Applied Science Private University has approved the above referenced protocol.

Date of approval: 20/May./2024, Date of expiration: 19/May./2026.

During this one year approval period, regular reviews are required. The protocol is due for a first review no later than 20/Aug./2024, and a second review no later than 20/Nov./2024.

The IRB staff will make every effort to send investigators regular reminders. However, investigators are responsible for submitting a regular review in advance of the review due date to ensure the continuity of IRB approval. It is very important that these deadlines are not missed. Failure to submit a regular review on time may result in the termination of the protocol. To continue this research beyond the one year approval period, a new protocol submission will be required.

It is the responsibility of the investigators to notify the IRB of any proposed changes regarding the work described within this protocol. Investigators agree that no such changes will be implemented until approval by the IRB, except where absolutely necessary to eliminate apparent immediate hazards to person(s)..

**Dr. Samar Thiab**

**IRB Chair**

  
د. سامر ثياب  
ق.ا. عميد كلية الصيدلة

أول جامعة خاصة تحصل على الاعتمادات والتصنيفات العالمية والمحلية

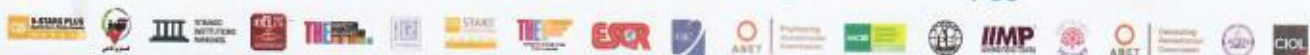

Supplement: Supplementary file 1 [file supplementary]
