# Supplementary material for: An Increase in the Prevalence of Clinically-Relevant Resistance-Associated Substitutions in Four Direct-Acting Antiviral Regimens: A Study Using GenBank HCV Sequences
Source: Preprints.org preprint supplement (doi:10.20944/preprints202407.0005.v1), 2024-07-01
Supplement: Supplementary file 1 [file supplementary]

**Supplementary file S1**

The full list of GenBank accession numbers for the HCV sequences analyzed in this study

| **Accession** | **Accession** | **Accession** | **Accession** | **Accession** |
| --- | --- | --- | --- | --- |
| AB249644 | JX463527 | KY620450 | MT632148 | OK553071 |
| AB429050 | JX463528 | KY620451 | MT632149 | OK553072 |
| AB622121 | JX463529 | KY620452 | MT632150 | OK553073 |
| AB677527 | JX463530 | KY620453 | MT632151 | OK553074 |
| AB677529 | JX463532 | KY620454 | MT632152 | OK553075 |
| AB677530 | JX463533 | KY620455 | MT632153 | OK553076 |
| AB677531 | JX463534 | KY620456 | MT632154 | OK553077 |
| AB677532 | JX463535 | KY620457 | MT632155 | OK553078 |
| AB677533 | JX463536 | KY620458 | MT632156 | OK553079 |
| AB690460 | JX463537 | KY620459 | MT632157 | OK553080 |
| AB690461 | JX463538 | KY620460 | MT632158 | OK553081 |
| AB792683 | JX463539 | KY620461 | MT632159 | OK553082 |
| AB795432 | JX463540 | KY620462 | MT632160 | OK553083 |
| AY587844 | JX463541 | KY620463 | MT632161 | OK553084 |
| AY587845 | JX463542 | KY620464 | MT632162 | OK553085 |
| AY956463 | JX463543 | KY620465 | MT632163 | OK553086 |
| AY956464 | JX463544 | KY620466 | MT632164 | OK553087 |
| AY956465 | JX463545 | KY620467 | MT632165 | OK553088 |
| AY956467 | JX463546 | KY620470 | MT632167 | OK553089 |
| AY956468 | JX463547 | KY620471 | MT632168 | OK553090 |
| AY956469 | JX463548 | KY620472 | MT632169 | OK553091 |
| D10750 | JX463549 | KY620473 | MT632170 | OK553092 |
| D13558 | JX463550 | KY620474 | MT632171 | OK553093 |
| D89815 | JX463551 | KY620475 | MT632172 | OK553094 |
| DQ430811 | JX463552 | KY620476 | MT632174 | OK553095 |
| DQ430813 | JX463553 | KY620477 | MT632175 | OK553096 |
| DQ430815 | JX463554 | KY620480 | MT632176 | OK553097 |
| DQ430817 | JX463555 | KY620481 | MT632177 | OK553098 |
| DQ430819 | JX463556 | KY620482 | MT632178 | OL332047 |
| DQ430820 | JX463557 | KY620484 | MT632179 | OL332048 |
| DQ889251 | JX463558 | KY620485 | MT632180 | OL332049 |
| DQ889252 | JX463559 | KY620486 | MT632181 | OL332050 |
| DQ889253 | JX463560 | KY620487 | MT632182 | OL332051 |
| DQ889254 | JX463561 | KY620488 | MT632183 | OL332052 |
| DQ889255 | JX463562 | KY620489 | MT632184 | OL332053 |
| DQ889256 | JX463563 | KY620490 | MT632185 | OL332054 |
| DQ889257 | JX463564 | KY620491 | MT632186 | OL332055 |
| DQ889258 | JX463565 | KY620492 | MT632187 | OL332056 |
| DQ889259 | JX463566 | KY620493 | MT632188 | OL332057 |
| DQ889261 | JX463567 | KY620494 | MT632190 | OL332058 |
| DQ889262 | JX463568 | KY620495 | MT632191 | OL332059 |
| DQ889263 | JX463569 | KY620496 | MT632192 | OL332060 |
| DQ889264 | JX463570 | KY620497 | MT632193 | OL332061 |
| DQ889265 | JX463571 | KY620498 | MT632194 | OL332062 |
| DQ889266 | JX463572 | KY620499 | MT995311 | OL332063 |
| DQ889267 | JX463573 | KY620500 | MT995312 | OL332064 |
| DQ889268 | JX463574 | KY620501 | MT995313 | OL332065 |
| DQ889269 | JX463575 | KY620502 | MT995314 | OL332066 |
| DQ889270 | JX463576 | KY620503 | MT995315 | OL332067 |
| DQ889271 | JX463577 | KY620504 | MT995316 | OL332068 |
| DQ889272 | JX463578 | KY620505 | MT995317 | OL332069 |
| DQ889273 | JX463579 | KY620506 | MT995318 | OL332070 |
| DQ889274 | JX463580 | KY620507 | MT995319 | OL332071 |
| DQ889275 | JX463581 | KY620508 | MT995320 | OL332072 |
| DQ889276 | JX463582 | KY620509 | MT995321 | OL332073 |
| DQ889277 | JX463583 | KY620510 | MT995322 | OL332074 |
| DQ889278 | JX463584 | KY620511 | MT995323 | OL332075 |
| DQ889279 | JX463585 | KY620512 | MT995324 | OL332076 |
| DQ889280 | JX463586 | KY620513 | MT995325 | OL332077 |
| DQ889281 | JX463587 | KY620514 | MT995326 | OL332078 |
| DQ889282 | JX463588 | KY620515 | MT995327 | OL332079 |
| DQ889283 | JX463589 | KY620516 | MT995328 | OL332080 |
| DQ889284 | JX463590 | KY620517 | MT995329 | OL332081 |
| DQ889286 | JX463591 | KY620518 | MT995330 | OL332082 |
| DQ889287 | JX463592 | KY620519 | MT995331 | OL332083 |
| DQ889288 | JX463594 | KY620520 | MT995332 | OL332084 |
| DQ889289 | JX463595 | KY620521 | MT995333 | OL332085 |
| DQ889290 | JX463596 | KY620522 | MT995334 | OL332086 |
| DQ889291 | JX463597 | KY620523 | MT995335 | OL332087 |
| DQ889292 | JX463598 | KY620524 | MT995336 | OL332088 |
| DQ889293 | JX463599 | KY620525 | MT995337 | OL332089 |
| DQ889294 | JX463600 | KY620526 | MT995338 | OL332090 |
| DQ889295 | JX463601 | KY620527 | MT995339 | OL332091 |
| DQ889296 | JX463605 | KY620528 | MT995340 | OL332092 |
| DQ889297 | JX463606 | KY620529 | MT995341 | OL332093 |
| DQ889298 | JX463607 | KY620530 | MT995342 | OL332094 |
| DQ889299 | JX463608 | KY620531 | MT995343 | OL332095 |
| DQ889300 | JX463609 | KY620532 | MT995344 | OL332096 |
| DQ988073 | JX463610 | KY620533 | MT995345 | OL332097 |
| DQ988074 | JX463611 | KY620534 | MT995346 | OL332098 |
| DQ988075 | JX463612 | KY620535 | MT995347 | OL332099 |
| DQ988076 | JX463613 | KY620536 | MT995348 | OL332100 |
| DQ988077 | JX463614 | KY620537 | MT995349 | OL332101 |
| DQ988078 | JX463615 | KY620538 | MT995350 | OL332102 |
| DQ988079 | JX463616 | KY620539 | MT995351 | OL332103 |
| EF032883 | JX463617 | KY620540 | MT995352 | OL332104 |
| EF032884 | JX463619 | KY620541 | MT995353 | OL332105 |
| EF032885 | JX463620 | KY620542 | MT995354 | OL332106 |
| EF032886 | JX463621 | KY620543 | MT995355 | OL332107 |
| EF032887 | JX463622 | KY620545 | MW041294 | OL332108 |
| EF032889 | JX463623 | KY620546 | MW041295 | OL332109 |
| EF032890 | JX463624 | KY620548 | MW041296 | OL332110 |
| EF032891 | JX463625 | KY620549 | MW041297 | OL332111 |
| EF032892 | JX463626 | KY620550 | MW041298 | OL332112 |
| EF032893 | JX463627 | KY620551 | MW041299 | OL332113 |
| EF032894 | JX463628 | KY620552 | MW531222 | OL332114 |
| EF032895 | JX463629 | KY620553 | MW629116 | OL332115 |
| EF032896 | JX463630 | KY620554 | MW629117 | OL332116 |
| EF032898 | JX463631 | KY620555 | MW629118 | OL332117 |
| EF032899 | JX463632 | KY620556 | MW629119 | OL332118 |
| EF032900 | JX463633 | KY620557 | MW629120 | OL332119 |
| EU155213 | JX463634 | KY620558 | MW675788 | OL332120 |
| EU155214 | JX463635 | KY620560 | MW675789 | OL332121 |
| EU155215 | JX463636 | KY620563 | MW675790 | OL332122 |
| EU155216 | JX463637 | KY620565 | MW675791 | OL332123 |
| EU155217 | JX463638 | KY620566 | MW675792 | OL332124 |
| EU155218 | JX463639 | KY620567 | MW675793 | OL332125 |
| EU155219 | JX463640 | KY620568 | MW675794 | OL332126 |
| EU155220 | JX472005 | KY620570 | MW675795 | OL332127 |
| EU155221 | JX472006 | KY620571 | MW675796 | OL332128 |
| EU155222 | JX472007 | KY620573 | MW675797 | OL332129 |
| EU155224 | JX472008 | KY620574 | MW675798 | OL332130 |
| EU155225 | KC155254 | KY620575 | MW675799 | OL332131 |
| EU155226 | KC191671 | KY620576 | MW675800 | OL332132 |
| EU155227 | KC197226 | KY620577 | MW689948 | OL332133 |
| EU155228 | KC197227 | KY620579 | MW689949 | OL332134 |
| EU155229 | KC197228 | KY620581 | MW689951 | OL332135 |
| EU155230 | KC197230 | KY620582 | MW689952 | OL332136 |
| EU155231 | KC197231 | KY620583 | MW689953 | OL332137 |
| EU155232 | KC197232 | KY620584 | MW689955 | OL332138 |
| EU155233 | KC197233 | KY620585 | MW689956 | OL332139 |
| EU155234 | KC197234 | KY620586 | MW689957 | OL332140 |
| EU155235 | KC197235 | KY620587 | MW689958 | OL332141 |
| EU155236 | KC197236 | KY620589 | MW689959 | OL332142 |
| EU155237 | KC197237 | KY620590 | MW689960 | OL332143 |
| EU155238 | KC439481 | KY620592 | MW689961 | OL332144 |
| EU155239 | KC439482 | KY620593 | MW689962 | OL332145 |
| EU155240 | KC439483 | KY620594 | MW689967 | OL332146 |
| EU155241 | KC439484 | KY620595 | MW689968 | OL332147 |
| EU155242 | KC439485 | KY620596 | MW689969 | OL332148 |
| EU155243 | KC439486 | KY620597 | MW689970 | OL332149 |
| EU155244 | KC439487 | KY620598 | MW689971 | OL332150 |
| EU155245 | KC439488 | KY620599 | MW689972 | OL332151 |
| EU155246 | KC439489 | KY620600 | MW689973 | OL332152 |
| EU155247 | KC439490 | KY620601 | MW689974 | OL332153 |
| EU155248 | KC439491 | KY620602 | MW689975 | OL332154 |
| EU155249 | KC439492 | KY620603 | MW689976 | OL332155 |
| EU155250 | KC439493 | KY620604 | MW689977 | OL332156 |
| EU155251 | KC439494 | KY620605 | MW689979 | OL332157 |
| EU155252 | KC439495 | KY620606 | MW689980 | OL332158 |
| EU155253 | KC439496 | KY620607 | MW689981 | OL332159 |
| EU155254 | KC439497 | KY620608 | MW689982 | OL332160 |
| EU155255 | KC439498 | KY620609 | MW689983 | OL332161 |
| EU155256 | KC439499 | KY620611 | MW689984 | OL332162 |
| EU155257 | KC439500 | KY620612 | MW689985 | OL332163 |
| EU155258 | KC439501 | KY620613 | MW689986 | OL332164 |
| EU155259 | KC439502 | KY620614 | MW689987 | OL332165 |
| EU155260 | KC439503 | KY620615 | MW689988 | OL332166 |
| EU155261 | KC439504 | KY620616 | MW689989 | OL332167 |
| EU155262 | KC439505 | KY620617 | MW689990 | OL332168 |
| EU155263 | KC439506 | KY620618 | MW689991 | OL332169 |
| EU155264 | KC439507 | KY620619 | MW689992 | OL332170 |
| EU155265 | KC439508 | KY620620 | MW689993 | OL332171 |
| EU155266 | KC439509 | KY620621 | MW689994 | OL332172 |
| EU155267 | KC439510 | KY620622 | MW689995 | OL332173 |
| EU155268 | KC439511 | KY620623 | MW689996 | OL332174 |
| EU155269 | KC439512 | KY620624 | MW689997 | OL332179 |
| EU155270 | KC439513 | KY620625 | MW689998 | OL332180 |
| EU155271 | KC439514 | KY620626 | MW689999 | OL332181 |
| EU155272 | KC439515 | KY620627 | MW690000 | OL332182 |
| EU155273 | KC439516 | KY620628 | MW690001 | OL332183 |
| EU155274 | KC439517 | KY620629 | MW690002 | OL332184 |
| EU155275 | KC439518 | KY620630 | MW690003 | OL332185 |
| EU155276 | KC439519 | KY620631 | MW690004 | OL332186 |
| EU155277 | KC439520 | KY620632 | MW690005 | OL332187 |
| EU155278 | KC439521 | KY620633 | MW690006 | OL332188 |
| EU155279 | KC439522 | KY620634 | MW690007 | OL332189 |
| EU155280 | KC439523 | KY620635 | MW690008 | OL332190 |
| EU155281 | KC439524 | KY620637 | MW690009 | OL332191 |
| EU155282 | KC439525 | KY620639 | MW690010 | OL332192 |
| EU155283 | KC439526 | KY620640 | MW690011 | OL332193 |
| EU155284 | KC439527 | KY620643 | MW690012 | OL332194 |
| EU155285 | KC844037 | KY620644 | MW690013 | OL332195 |
| EU155286 | KC844038 | KY620645 | MW690014 | OL332196 |
| EU155287 | KC844039 | KY620646 | MW690015 | OL332197 |
| EU155288 | KC844040 | KY620648 | MW690016 | OL332198 |
| EU155289 | KC844041 | KY620649 | MW690017 | OL332199 |
| EU155290 | KC844042 | KY620650 | MW690018 | OL332200 |
| EU155291 | KC844043 | KY620651 | MW690019 | OL332201 |
| EU155292 | KC844044 | KY620652 | MW690020 | OL332202 |
| EU155293 | KC844045 | KY620653 | MW715685 | OL332203 |
| EU155294 | KC844047 | KY620654 | MW715686 | OM222702 |
| EU155295 | KC844048 | KY620657 | MW715687 | OM222703 |
| EU155296 | KC844049 | KY620658 | MW715688 | OM525854 |
| EU155297 | KC844050 | KY620659 | MW715689 | OM525856 |
| EU155298 | KC844051 | KY620660 | MZ161145 | OM525857 |
| EU155299 | KC844052 | KY620661 | MZ161146 | OM525858 |
| EU155300 | KC967476 | KY620662 | MZ161147 | OM525859 |
| EU155301 | KC967477 | KY620663 | MZ161148 | OM525860 |
| EU155302 | KC967478 | KY620664 | MZ161149 | OM525861 |
| EU155303 | KC967479 | KY620665 | MZ161150 | OM525862 |
| EU155304 | KF035123 | KY620666 | MZ161151 | OM525863 |
| EU155305 | KF035124 | KY620667 | MZ161153 | OM525864 |
| EU155306 | KF035125 | KY620668 | MZ161154 | OM525865 |
| EU155307 | KF035126 | KY620669 | MZ161155 | OM525866 |
| EU155308 | KF035127 | KY620670 | MZ161156 | OM525867 |
| EU155309 | KF700370 | KY620671 | MZ161157 | OM525868 |
| EU155310 | KJ437295 | KY620672 | MZ161158 | OM525869 |
| EU155311 | KJ437300 | KY620673 | MZ171127 | OM525870 |
| EU155312 | KJ437342 | KY620674 | MZ171128 | OM525872 |
| EU155313 | KM043272 | KY620675 | MZ171129 | OM525873 |
| EU155314 | KM043273 | KY620676 | MZ171130 | OM525874 |
| EU155315 | KM043274 | KY620677 | MZ171131 | OM525875 |
| EU155316 | KM043275 | KY620678 | MZ171132 | OM525876 |
| EU155317 | KM043276 | KY620679 | MZ325443 | OM525877 |
| EU155318 | KM043277 | KY620680 | MZ325444 | OM525878 |
| EU155319 | KM043278 | KY620682 | MZ504973 | OM525879 |
| EU155320 | KM043279 | KY620684 | MZ504974 | OM525880 |
| EU155321 | KM043280 | KY620685 | MZ504975 | OM525881 |
| EU155322 | KM043281 | KY620686 | MZ504976 | OM525882 |
| EU155323 | KM043282 | KY620687 | MZ541883 | OM525883 |
| EU155324 | KM043283 | KY620689 | MZ541884 | OM525884 |
| EU155325 | KM043284 | KY620690 | MZ556841 | OM525885 |
| EU155326 | KM043285 | KY620691 | MZ556842 | OM525886 |
| EU155327 | KM102767 | KY620692 | MZ556843 | OM525887 |
| EU155328 | KM102768 | KY620693 | MZ556844 | OM525888 |
| EU155329 | KM102769 | KY620694 | MZ556845 | OM525890 |
| EU155330 | KM102770 | KY620695 | MZ556846 | OM525891 |
| EU155331 | KM277568 | KY620696 | MZ556847 | OM525892 |
| EU155332 | KM277569 | KY620697 | MZ556848 | OM525893 |
| EU155333 | KM277570 | KY620698 | MZ556849 | OM525894 |
| EU155334 | KM277571 | KY620699 | MZ556850 | OM525895 |
| EU155335 | KM277572 | KY620700 | MZ556851 | OM525896 |
| EU155336 | KM277573 | KY620701 | MZ556852 | OM525897 |
| EU155337 | KM277574 | KY620702 | MZ556853 | OM525898 |
| EU155338 | KM277575 | KY620703 | MZ556854 | OM525899 |
| EU155339 | KM277576 | KY620705 | MZ556855 | OM525900 |
| EU155340 | KM277577 | KY620706 | MZ556856 | OM525901 |
| EU155341 | KM277578 | KY620707 | MZ556857 | OM525902 |
| EU155342 | KM277579 | KY620708 | MZ556858 | OM525904 |
| EU155343 | KM277580 | KY620709 | MZ556859 | OM525905 |
| EU155344 | KM277581 | KY620710 | MZ556860 | OM525906 |
| EU155345 | KM587622 | KY620711 | MZ556861 | OM525907 |
| EU155346 | KR870888 | KY620712 | MZ556862 | OM525909 |
| EU155347 | KT595242 | KY620713 | MZ556863 | OM896881 |
| EU155348 | KT734516 | KY620714 | MZ556864 | OM896882 |
| EU155349 | KT734517 | KY620715 | MZ556865 | OM896883 |
| EU155350 | KT734518 | KY620716 | MZ556866 | OM896884 |
| EU155351 | KT734519 | KY620717 | MZ556867 | OM896885 |
| EU155352 | KT734520 | KY620718 | MZ556868 | OM896886 |
| EU155353 | KT734521 | KY620719 | MZ556869 | OM896887 |
| EU155354 | KT734522 | KY620720 | MZ556870 | OM896888 |
| EU155355 | KT734523 | KY620721 | MZ556871 | OM896889 |
| EU155356 | KT734524 | KY620723 | MZ556872 | OM896890 |
| EU155357 | KT734525 | KY620724 | MZ556873 | OM896891 |
| EU155358 | KT734526 | KY620725 | MZ556874 | OM896893 |
| EU155359 | KT734527 | KY620727 | MZ556876 | OM896894 |
| EU155360 | KT734528 | KY620728 | MZ556877 | OM896895 |
| EU155361 | KT734529 | KY620729 | MZ556878 | OM896896 |
| EU155362 | KT734530 | KY620730 | MZ556879 | OM896897 |
| EU155363 | KT734531 | KY620731 | MZ556880 | OM896898 |
| EU155364 | KT734532 | KY620732 | MZ556881 | OM896899 |
| EU155365 | KT734533 | KY620733 | MZ556882 | OM896900 |
| EU155366 | KT734534 | KY620734 | MZ556883 | OM896901 |
| EU155367 | KT734535 | KY620735 | MZ556884 | OM896903 |
| EU155368 | KT734536 | KY620736 | MZ556885 | OM896904 |
| EU155369 | KT734537 | KY620737 | MZ556886 | OM896905 |
| EU155370 | KT734538 | KY620738 | MZ556887 | OM896906 |
| EU155371 | KT734539 | KY620741 | MZ556888 | OM896907 |
| EU155372 | KT734540 | KY620742 | MZ556889 | OM896908 |
| EU155373 | KT734541 | KY620743 | MZ556890 | OM896909 |
| EU155374 | KT734542 | KY620745 | MZ556891 | OM896910 |
| EU155375 | KT734543 | KY620746 | MZ556892 | OM896911 |
| EU155376 | KT734544 | KY620747 | MZ556893 | OM896912 |
| EU155377 | KT734545 | KY620749 | MZ556894 | OM896913 |
| EU155378 | KT734546 | KY620750 | MZ556895 | OM896914 |
| EU155379 | KT734548 | KY620751 | MZ556896 | OM896915 |
| EU155380 | KT734549 | KY620752 | MZ556897 | OM896916 |
| EU155381 | KT734550 | KY620753 | MZ556898 | OM896917 |
| EU158186 | KT734551 | KY620754 | MZ556899 | OM896918 |
| EU234061 | KT734552 | KY620756 | MZ556900 | OM896919 |
| EU234062 | KT734553 | KY620757 | MZ556901 | OM896920 |
| EU234063 | KT734554 | KY620758 | MZ556902 | OM896921 |
| EU234064 | KT734555 | KY620759 | MZ556903 | OM896923 |
| EU234065 | KT734556 | KY620760 | MZ556904 | OM896924 |
| EU239713 | KT734557 | KY620761 | MZ556905 | OM896925 |
| EU239714 | KT734558 | KY620762 | MZ556906 | OM896926 |
| EU239715 | KT734559 | KY620763 | MZ556907 | OM896927 |
| EU239716 | KT734560 | KY620764 | MZ556908 | OM896928 |
| EU250017 | KT734561 | KY620765 | MZ556909 | OM896929 |
| EU255927 | KT734562 | KY620766 | MZ556910 | OM896930 |
| EU255928 | KT734563 | KY620767 | MZ556911 | OM896931 |
| EU255929 | KT734564 | KY620768 | MZ556912 | OM896932 |
| EU255930 | KT734565 | KY620769 | MZ556913 | OM896933 |
| EU255931 | KT734566 | KY620770 | MZ556914 | OM896934 |
| EU255932 | KT734567 | KY620772 | MZ556915 | OM896935 |
| EU255933 | KT734568 | KY620773 | MZ556916 | OM896936 |
| EU255934 | KT734569 | KY620775 | MZ556917 | OM896937 |
| EU255935 | KT734570 | KY620777 | MZ556918 | OM896939 |
| EU255936 | KT734571 | KY620778 | MZ556919 | OM896940 |
| EU255937 | KT734572 | KY620779 | MZ556920 | OM896941 |
| EU255938 | KT734573 | KY620780 | MZ556921 | OM896942 |
| EU255939 | KT734574 | KY620781 | MZ556922 | OM896943 |
| EU255940 | KT734575 | KY620782 | MZ556923 | OM896944 |
| EU255941 | KT734576 | KY620783 | MZ556924 | OM896945 |
| EU255942 | KT734577 | KY620784 | MZ556925 | OM896946 |
| EU255943 | KT734578 | KY620785 | MZ556926 | OM896947 |
| EU255944 | KT734579 | KY620788 | MZ556927 | OM896948 |
| EU255945 | KT734580 | KY620789 | MZ556928 | OM896949 |
| EU255946 | KT734581 | KY620790 | MZ556929 | OM896950 |
| EU255947 | KT734582 | KY620791 | MZ556930 | OM896951 |
| EU255948 | KT734583 | KY620792 | MZ556931 | OM896952 |
| EU255949 | KT734584 | KY620793 | MZ556932 | OM896953 |
| EU255950 | KT734585 | KY620794 | MZ556933 | OM896954 |
| EU255951 | KT734586 | KY620795 | MZ556934 | OM896955 |
| EU255952 | KT734587 | KY620797 | MZ556935 | OM896956 |
| EU255953 | KT734588 | KY620798 | MZ556936 | OM896957 |
| EU255954 | KT734589 | KY620799 | OK552682 | OM896958 |
| EU255955 | KT734590 | KY620801 | OK552683 | OM896959 |
| EU255956 | KT734591 | KY620802 | OK552684 | OM896960 |
| EU255957 | KT734592 | KY620803 | OK552685 | OM896961 |
| EU255958 | KT734593 | KY620804 | OK552686 | OM896962 |
| EU255959 | KT734594 | KY620806 | OK552687 | OM896963 |
| EU255960 | KT734595 | KY620808 | OK552688 | OM896964 |
| EU255962 | KT734596 | KY620810 | OK552689 | OM896965 |
| EU255963 | KT734597 | KY620811 | OK552690 | OM896966 |
| EU255964 | KT734598 | KY620812 | OK552691 | OM896967 |
| EU255965 | KT734599 | KY620813 | OK552692 | OM896968 |
| EU255966 | KT734600 | KY620814 | OK552693 | OM896969 |
| EU255967 | KT734601 | KY620816 | OK552694 | OM896970 |
| EU255968 | KT734602 | KY620817 | OK552695 | OM896971 |
| EU255969 | KT734603 | KY620819 | OK552696 | OM896972 |
| EU255970 | KT734604 | KY620820 | OK552697 | OM896973 |
| EU255971 | KT734605 | KY620821 | OK552698 | OM896974 |
| EU255973 | KT734608 | KY620822 | OK552699 | OM896975 |
| EU255974 | KT734609 | KY620823 | OK552700 | OM896976 |
| EU255975 | KT734610 | KY620824 | OK552701 | OM896977 |
| EU255976 | KT735178 | KY620825 | OK552702 | OM896978 |
| EU255977 | KT735184 | KY620826 | OK552703 | OM896979 |
| EU255978 | KT735185 | KY620827 | OK552704 | OM896980 |
| EU255979 | KT735186 | KY620828 | OK552705 | OM896981 |
| EU255980 | KT983617 | KY620829 | OK552706 | OM896982 |
| EU255981 | KU871279 | KY620831 | OK552707 | OM896983 |
| EU255982 | KU871280 | KY620832 | OK552708 | OM896984 |
| EU255983 | KU871281 | KY620833 | OK552709 | OM896985 |
| EU255984 | KU871282 | KY620834 | OK552710 | OM896987 |
| EU255985 | KU871283 | KY620835 | OK552711 | OM896988 |
| EU255986 | KU871284 | KY620836 | OK552712 | OM896989 |
| EU255987 | KU871285 | KY620837 | OK552713 | OM896991 |
| EU255988 | KU871286 | KY620838 | OK552714 | OM896993 |
| EU255989 | KU871287 | KY620840 | OK552715 | OM896994 |
| EU255990 | KU871288 | KY620841 | OK552716 | OM896995 |
| EU255991 | KU871289 | KY620842 | OK552717 | OM896996 |
| EU255992 | KU871290 | KY620843 | OK552718 | OM896997 |
| EU255994 | KU871292 | KY620844 | OK552719 | OM896998 |
| EU255995 | KU871293 | KY620845 | OK552720 | OM896999 |
| EU255996 | KU871294 | KY620846 | OK552721 | OM897000 |
| EU255997 | KU871295 | KY620847 | OK552722 | ON314813 |
| EU255998 | KU871296 | KY620848 | OK552723 | ON314815 |
| EU255999 | KU871297 | KY620849 | OK552724 | ON314816 |
| EU256000 | KU871298 | KY620850 | OK552725 | ON314817 |
| EU256001 | KU871299 | KY620851 | OK552726 | ON314818 |
| EU256002 | KU871300 | KY620852 | OK552727 | ON314819 |
| EU256003 | KU871301 | KY620853 | OK552728 | ON314820 |
| EU256004 | KU871302 | KY620854 | OK552729 | ON314821 |
| EU256005 | KU871303 | KY620855 | OK552730 | ON314823 |
| EU256006 | KU871304 | KY620856 | OK552731 | ON314824 |
| EU256007 | KU871305 | KY620857 | OK552732 | ON314825 |
| EU256008 | KU871306 | KY620858 | OK552733 | ON314826 |
| EU256009 | KU871307 | KY620859 | OK552734 | ON314827 |
| EU256010 | KU871308 | KY620860 | OK552735 | ON314828 |
| EU256011 | KU871309 | KY620862 | OK552736 | ON630763 |
| EU256012 | KU871310 | KY620864 | OK552737 | ON630764 |
| EU256013 | KU871311 | KY620866 | OK552738 | ON630765 |
| EU256014 | KX621422 | KY620867 | OK552739 | ON630766 |
| EU256015 | KX621423 | KY620869 | OK552740 | ON630767 |
| EU256016 | KX621424 | KY620871 | OK552741 | ON630768 |
| EU256017 | KX621425 | KY620872 | OK552742 | ON630769 |
| EU256018 | KX621426 | KY620874 | OK552743 | ON630770 |
| EU256019 | KX621427 | KY620875 | OK552744 | ON630771 |
| EU256020 | KX621428 | KY620876 | OK552745 | ON630772 |
| EU256021 | KX621429 | KY620877 | OK552746 | ON630773 |
| EU256022 | KX621430 | KY704917 | OK552747 | ON630774 |
| EU256023 | KX621431 | KY780122 | OK552748 | ON630775 |
| EU256024 | KX621432 | KY780123 | OK552749 | ON630776 |
| EU256025 | KX621433 | KY883981 | OK552750 | ON630777 |
| EU256026 | KX621434 | KY883982 | OK552751 | ON630778 |
| EU256027 | KX621435 | LC209863 | OK552752 | ON630779 |
| EU256028 | KX621436 | LC209864 | OK552753 | ON630780 |
| EU256029 | KX621437 | LC209865 | OK552754 | ON630781 |
| EU256030 | KX621438 | LC209866 | OK552755 | ON630782 |
| EU256031 | KX621439 | LC209867 | OK552756 | ON630783 |
| EU256032 | KX621440 | LC209868 | OK552757 | ON630784 |
| EU256033 | KX621441 | LC209869 | OK552758 | ON630785 |
| EU256034 | KX621442 | LC209870 | OK552759 | ON630786 |
| EU256035 | KX621443 | LC209871 | OK552760 | ON630787 |
| EU256036 | KX621444 | LC209872 | OK552761 | ON630788 |
| EU256037 | KX621445 | LC209873 | OK552762 | ON630789 |
| EU256038 | KX621446 | LC209875 | OK552763 | ON630790 |
| EU256039 | KX621447 | LC209876 | OK552764 | ON630791 |
| EU256040 | KX621448 | LC209878 | OK552765 | ON630792 |
| EU256041 | KX621449 | LC209879 | OK552766 | ON630794 |
| EU256042 | KX621450 | LC209880 | OK552767 | ON630795 |
| EU256043 | KX621451 | LC209881 | OK552768 | ON630796 |
| EU256044 | KX621452 | LC209884 | OK552769 | ON630797 |
| EU256045 | KX621453 | LC209885 | OK552770 | ON630798 |
| EU256046 | KX621454 | LC209886 | OK552771 | ON630799 |
| EU256047 | KX621455 | LC209887 | OK552772 | ON630800 |
| EU256048 | KX621456 | LC368309 | OK552773 | ON630801 |
| EU256049 | KX621457 | LC368310 | OK552774 | ON630802 |
| EU256050 | KX621458 | LC368311 | OK552775 | ON630803 |
| EU256051 | KX621459 | LC368312 | OK552776 | ON630804 |
| EU256052 | KX621460 | LC368313 | OK552777 | ON630805 |
| EU256053 | KX621461 | LC368314 | OK552778 | ON630806 |
| EU256055 | KX621462 | LC368315 | OK552779 | ON630807 |
| EU256056 | KX621463 | LC368316 | OK552780 | ON630808 |
| EU256057 | KX621464 | LC368318 | OK552781 | ON630809 |
| EU256058 | KX621465 | LC368319 | OK552782 | ON630810 |
| EU256059 | KX621466 | LC368320 | OK552783 | ON630811 |
| EU256060 | KX621467 | LC368321 | OK552784 | ON630812 |
| EU256061 | KX621468 | LC368322 | OK552785 | ON630813 |
| EU256062 | KX621469 | LC368323 | OK552786 | ON630814 |
| EU256064 | KX621470 | LC368324 | OK552787 | ON630815 |
| EU256065 | KX621471 | LC368325 | OK552788 | ON630816 |
| EU256066 | KX621472 | LC368326 | OK552789 | ON630817 |
| EU256067 | KX621473 | LC368327 | OK552790 | ON630818 |
| EU256068 | KX621474 | LC368329 | OK552791 | ON630819 |
| EU256069 | KX621475 | LC368330 | OK552792 | ON630820 |
| EU256070 | KX621476 | LC368331 | OK552793 | ON630821 |
| EU256071 | KX621477 | LC368332 | OK552794 | ON630822 |
| EU256072 | KX621478 | LC368333 | OK552795 | ON630823 |
| EU256073 | KX621479 | LC368334 | OK552796 | ON630824 |
| EU256074 | KX621480 | LC368335 | OK552797 | ON630825 |
| EU256075 | KX621481 | LC368336 | OK552798 | ON630826 |
| EU256076 | KX621482 | LC368337 | OK552799 | ON630827 |
| EU256077 | KX621483 | LC368338 | OK552800 | ON630828 |
| EU256078 | KX621484 | LC368339 | OK552801 | ON630829 |
| EU256079 | KX621485 | LC368340 | OK552802 | ON630830 |
| EU256080 | KX621486 | LC368341 | OK552803 | ON630831 |
| EU256081 | KX621487 | LC368342 | OK552804 | ON630832 |
| EU256082 | KX621488 | LC368343 | OK552805 | ON630833 |
| EU256083 | KX621489 | LC368344 | OK552806 | ON630834 |
| EU256084 | KX621490 | LC368345 | OK552807 | ON630835 |
| EU256085 | KX621491 | LC368346 | OK552808 | ON630836 |
| EU256086 | KX621492 | LC368347 | OK552809 | ON630837 |
| EU256087 | KX621494 | LC368348 | OK552810 | ON630838 |
| EU256088 | KX621495 | LC368349 | OK552811 | ON630839 |
| EU256089 | KX621496 | LC368350 | OK552812 | ON630840 |
| EU256090 | KX621498 | LC368353 | OK552813 | ON630842 |
| EU256091 | KX621499 | LC368355 | OK552814 | ON630843 |
| EU256092 | KX621500 | LC368356 | OK552815 | ON630844 |
| EU256094 | KX621501 | LC368357 | OK552816 | ON630845 |
| EU256095 | KX621502 | LC368358 | OK552817 | ON630846 |
| EU256097 | KX621503 | LC368359 | OK552818 | ON630847 |
| EU256098 | KX621504 | LC368360 | OK552819 | ON630848 |
| EU256099 | KX621505 | LC368361 | OK552820 | ON630849 |
| EU256100 | KX621507 | LC368362 | OK552821 | ON630850 |
| EU256101 | KX621508 | LC368363 | OK552822 | ON630851 |
| EU256102 | KX621509 | LC368364 | OK552823 | ON630852 |
| EU256103 | KX621510 | LC368365 | OK552824 | ON630853 |
| EU256105 | KX621511 | LC368366 | OK552825 | ON630854 |
| EU256106 | KX621512 | LC368368 | OK552826 | ON630855 |
| EU256107 | KX621513 | LC368369 | OK552827 | ON630856 |
| EU260395 | KX621514 | LC368370 | OK552828 | ON630857 |
| EU260396 | KX621515 | LC368371 | OK552829 | ON630858 |
| EU482831 | KX621516 | LC368372 | OK552830 | ON630859 |
| EU482832 | KX621517 | LC368373 | OK552831 | ON630860 |
| EU482833 | KX621518 | LC368374 | OK552832 | ON630861 |
| EU482834 | KX621519 | LC368375 | OK552833 | ON630862 |
| EU482835 | KX621520 | LC368376 | OK552834 | ON630863 |
| EU482836 | KX621521 | LC368378 | OK552835 | ON630864 |
| EU482837 | KX621522 | LC368379 | OK552836 | ON630865 |
| EU482839 | KX621523 | LC368380 | OK552837 | ON630866 |
| EU482840 | KX621525 | LC368381 | OK552838 | ON630867 |
| EU482841 | KX621526 | LC368382 | OK552839 | ON630868 |
| EU482842 | KX621527 | LC368391 | OK552840 | ON630869 |
| EU482843 | KX621528 | LC368393 | OK552841 | ON630870 |
| EU482844 | KX621529 | LC368394 | OK552842 | ON630871 |
| EU482845 | KX621530 | LC368395 | OK552843 | ON630872 |
| EU482846 | KX621531 | LC368396 | OK552844 | ON630873 |
| EU482847 | KX621532 | LC368397 | OK552845 | ON630874 |
| EU482848 | KX621533 | LC368398 | OK552846 | ON630875 |
| EU482849 | KX621534 | LC368400 | OK552847 | ON630876 |
| EU482850 | KX621535 | LC368401 | OK552848 | ON630877 |
| EU482852 | KX621536 | LC368402 | OK552849 | ON630878 |
| EU482853 | KX621537 | LC368403 | OK552850 | ON630879 |
| EU482854 | KX621538 | LC368404 | OK552851 | ON630880 |
| EU482855 | KX621539 | LC368405 | OK552852 | ON630881 |
| EU482856 | KX621540 | LC368406 | OK552853 | ON630882 |
| EU482857 | KX621541 | LC368407 | OK552854 | ON630883 |
| EU482858 | KX621542 | LC368408 | OK552855 | ON630884 |
| EU482859 | KX621543 | LC368409 | OK552856 | ON630885 |
| EU482860 | KX621545 | LC368410 | OK552857 | ON630886 |
| EU482861 | KX621546 | LC368411 | OK552858 | ON630887 |
| EU482862 | KX621547 | LC368413 | OK552859 | ON630888 |
| EU482863 | KX621548 | LC368414 | OK552860 | ON630889 |
| EU482864 | KX621549 | LC368415 | OK552861 | ON630890 |
| EU482865 | KX621550 | LC368416 | OK552862 | ON630891 |
| EU482866 | KX621551 | LC368417 | OK552863 | ON630892 |
| EU482867 | KX621552 | LC368418 | OK552864 | ON630893 |
| EU482868 | KX621554 | LC368419 | OK552865 | ON630894 |
| EU482869 | KX621555 | LC368420 | OK552866 | ON630895 |
| EU482870 | KX621556 | LC368421 | OK552867 | ON630896 |
| EU482871 | KX766990 | LC368422 | OK552868 | ON630897 |
| EU482872 | KX766991 | LC368423 | OK552869 | ON630898 |
| EU482873 | KX766992 | LC368424 | OK552870 | ON630899 |
| EU482874 | KX766993 | LC368425 | OK552871 | ON630900 |
| EU482875 | KX766994 | LC368426 | OK552872 | ON676559 |
| EU482876 | KX766995 | LC368427 | OK552873 | OP022902 |
| EU482877 | KX766996 | LC368428 | OK552874 | OP022904 |
| EU482878 | KX766997 | LC368429 | OK552875 | OP022905 |
| EU482879 | KX766998 | LC368430 | OK552876 | OP022906 |
| EU482880 | KX766999 | LC368431 | OK552877 | OP022908 |
| EU482881 | KX767000 | LC368432 | OK552878 | OP022909 |
| EU482882 | KX767001 | LC368433 | OK552879 | OP022910 |
| EU482883 | KX767002 | LC368434 | OK552880 | OP022911 |
| EU482884 | KX767003 | LC368435 | OK552881 | OP022913 |
| EU482885 | KX767004 | LC368436 | OK552882 | OP022915 |
| EU482886 | KX767006 | LC368437 | OK552883 | OP022916 |
| EU482887 | KX767007 | LC368438 | OK552884 | OP022917 |
| EU482888 | KX767008 | LC368439 | OK552885 | OP022918 |
| EU482889 | KX767009 | LC368440 | OK552886 | OP022919 |
| EU529676 | KX767010 | LC368441 | OK552887 | OP022920 |
| EU529677 | KX767011 | LC368443 | OK552888 | OP022921 |
| EU529678 | KX767012 | LC368445 | OK552889 | OP555739 |
| EU529679 | KX767013 | LC368446 | OK552890 | OP555740 |
| EU529680 | KX767014 | LC368447 | OK552891 | OP555741 |
| EU529681 | KX767015 | LC368448 | OK552892 | OP555742 |
| EU529682 | KX767016 | LC368449 | OK552893 | OP555743 |
| EU569722 | KX767017 | MG406987 | OK552894 | OP555744 |
| EU569723 | KX767018 | MG437050 | OK552895 | OP555745 |
| EU595697 | KX767019 | MG878999 | OK552896 | OP894659 |
| EU595698 | KX767020 | MG879000 | OK552897 | OQ832071 |
| EU595699 | KX767021 | MH742360 | OK552898 | OQ873159 |
| EU660383 | KX767022 | MH742361 | OK552899 | OQ873160 |
| EU660384 | KX767023 | MH742362 | OK552900 | OQ873161 |
| EU660385 | KX767024 | MH742363 | OK552901 | OQ979408 |
| EU660386 | KX767025 | MH742364 | OK552902 | OQ979411 |
| EU660387 | KX767026 | MH742365 | OK552904 | OQ979413 |
| EU660388 | KX767027 | MH742366 | OK552905 | OR497849 |
| EU687193 | KX767028 | MH742367 | OK552906 | OR497853 |
| EU687194 | KX767029 | MH742368 | OK552907 | OR497854 |
| EU687195 | KX767030 | MH742369 | OK552908 | OR497855 |
| EU781746 | KX767031 | MH742370 | OK552909 | OR497856 |
| EU781747 | KX767032 | MH742371 | OK552911 | OR497857 |
| EU781749 | KX767033 | MH743149 | OK552912 | OR497858 |
| EU781750 | KX767034 | MH743151 | OK552914 | OR497860 |
| EU781751 | KX767035 | MH885469 | OK552915 | OR497861 |
| EU781752 | KX767036 | MH921830 | OK552916 | OR497862 |
| EU781753 | KX767037 | MK039720 | OK552917 | OR497863 |
| EU781760 | KX767038 | MK139015 | OK552918 | OR497864 |
| EU781763 | KX767039 | MK327981 | OK552920 | OR497865 |
| EU781767 | KX767040 | MK327984 | OK552921 | OR497866 |
| EU781768 | KX767041 | MK327985 | OK552922 | OR497867 |
| EU781770 | KX767042 | MK327986 | OK552923 | OR497868 |
| EU781771 | KX767043 | MK327987 | OK552924 | OR497869 |
| EU781772 | KX767044 | MK327988 | OK552925 | OR497870 |
| EU781773 | KX767045 | MK327989 | OK552926 | OR497871 |
| EU781774 | KX767046 | MK327990 | OK552927 | OR497872 |
| EU781776 | KX767047 | MK327991 | OK552928 | OR497873 |
| EU781777 | KX767048 | MK327992 | OK552929 | OR497874 |
| EU781779 | KX767049 | MK327993 | OK552930 | OR497875 |
| EU781780 | KX767050 | MK327996 | OK552931 | OR497876 |
| EU781781 | KX767051 | MK327997 | OK552932 | OR497877 |
| EU781782 | KX767054 | MK327998 | OK552933 | OR497878 |
| EU781783 | KX767055 | MK328001 | OK552934 | OR497879 |
| EU781785 | KX767056 | MK328002 | OK552935 | OR497880 |
| EU781786 | KX767057 | MK328003 | OK552936 | OR497881 |
| EU781787 | KX767058 | MK328005 | OK552937 | OR497883 |
| EU781788 | KX767059 | MK328006 | OK552938 | OR497884 |
| EU781789 | KX767060 | MK328007 | OK552939 | OR497885 |
| EU781790 | KX767061 | MK328010 | OK552940 | OR497887 |
| EU781793 | KX767062 | MK328012 | OK552941 | OR497888 |
| EU781794 | KX767063 | MK328013 | OK552942 | OR497889 |
| EU781795 | KX767064 | MK328014 | OK552943 | OR497890 |
| EU781796 | KX767065 | MK328019 | OK552944 | OR497892 |
| EU781797 | KX767066 | MK328020 | OK552945 | OR497894 |
| EU781798 | KX767067 | MK328021 | OK552946 | OR497896 |
| EU781799 | KX767068 | MK328022 | OK552947 | OR497897 |
| EU781800 | KX767069 | MK328023 | OK552948 | OR497898 |
| EU781802 | KX767070 | MK328026 | OK552949 | OR497899 |
| EU781803 | KX767071 | MK468926 | OK552950 | OR497900 |
| EU781831 | KX767072 | MK468927 | OK552951 | OR497904 |
| EU857431 | KX767073 | MK468928 | OK552952 | OR497905 |
| EU862824 | KX767074 | MK527508 | OK552953 | OR497907 |
| EU862826 | KX767075 | MK527509 | OK552954 | OR497909 |
| EU862827 | KX767076 | MK548363 | OK552955 | OR497910 |
| EU862828 | KX767077 | MK548365 | OK552956 | OR497911 |
| EU862829 | KY014622 | MK548368 | OK552957 | OR497912 |
| EU862830 | KY120328 | MK548369 | OK552958 | OR497913 |
| EU862831 | KY120329 | MN164843 | OK552959 | OR497916 |
| EU862832 | KY120330 | MN164844 | OK552960 | OR497919 |
| EU862833 | KY120331 | MN164845 | OK552961 | OR497920 |
| EU862835 | KY120332 | MN164846 | OK552962 | OR497921 |
| EU862836 | KY283130 | MN164847 | OK552963 | OR497923 |
| EU862837 | KY348757 | MN164849 | OK552964 | OR497924 |
| EU862838 | KY620314 | MN164850 | OK552966 | OR497925 |
| EU862839 | KY620316 | MN164851 | OK552967 | OR497929 |
| EU862840 | KY620317 | MN164852 | OK552968 | OR497930 |
| EU862841 | KY620321 | MN164853 | OK552969 | OR497931 |
| FJ024086 | KY620327 | MN164854 | OK552970 | OR497932 |
| FJ024087 | KY620328 | MN164855 | OK552971 | OR497933 |
| FJ024274 | KY620329 | MN164856 | OK552972 | OR497934 |
| FJ024275 | KY620338 | MN164857 | OK552973 | OR497935 |
| FJ024276 | KY620339 | MN164858 | OK552974 | OR497936 |
| FJ024277 | KY620340 | MN164859 | OK552975 | OR497937 |
| FJ024278 | KY620343 | MN164863 | OK552976 | OR497938 |
| FJ024279 | KY620346 | MN164864 | OK552977 | OR497939 |
| FJ024280 | KY620347 | MN164865 | OK552978 | OR497940 |
| FJ024281 | KY620348 | MN164866 | OK552979 | OR497944 |
| FJ024282 | KY620351 | MN164867 | OK552980 | OR497946 |
| FJ181999 | KY620352 | MN164868 | OK552981 | OR497948 |
| FJ182000 | KY620354 | MN164869 | OK552982 | OR497949 |
| FJ182001 | KY620356 | MN164870 | OK552983 | OR497950 |
| FJ205867 | KY620357 | MN164874 | OK552984 | OR497951 |
| FJ205868 | KY620359 | MN164875 | OK552985 | OR497952 |
| FJ205869 | KY620362 | MN164876 | OK552986 | OR497953 |
| FJ390394 | KY620363 | MN240359 | OK552987 | OR497954 |
| FJ390395 | KY620364 | MN326295 | OK552988 | OR497956 |
| FJ390396 | KY620365 | MN385563 | OK552989 | OR497959 |
| FJ390397 | KY620366 | MN385564 | OK552990 | OR497960 |
| FJ390398 | KY620367 | MN385583 | OK552991 | OR497961 |
| FJ390399 | KY620368 | MN628574 | OK552992 | OR497962 |
| FJ407092 | KY620369 | MN628575 | OK552993 | OR497963 |
| FJ410172 | KY620370 | MN628577 | OK552994 | OR497965 |
| FJ478453 | KY620371 | MN628578 | OK552995 | OR497966 |
| FN666428 | KY620372 | MN628579 | OK552996 | OR497967 |
| FN666429 | KY620373 | MN628580 | OK552997 | OR497968 |
| GQ149768 | KY620374 | MN628581 | OK552998 | OR497969 |
| GQ275355 | KY620375 | MN628582 | OK552999 | OR497970 |
| GQ356200 | KY620376 | MN628583 | OK553000 | OR497971 |
| GQ356201 | KY620377 | MN628584 | OK553001 | OR497972 |
| GQ356202 | KY620378 | MN628586 | OK553002 | OR497973 |
| GQ356203 | KY620379 | MN628587 | OK553003 | OR497974 |
| GQ356204 | KY620380 | MN628588 | OK553004 | OR497975 |
| GQ356205 | KY620381 | MN628589 | OK553005 | OR497977 |
| GQ356206 | KY620382 | MN628590 | OK553006 | OR497978 |
| GQ356207 | KY620383 | MN628591 | OK553007 | OR497979 |
| GQ356208 | KY620384 | MN628592 | OK553008 | OR497982 |
| GQ356209 | KY620385 | MN628593 | OK553009 | OR497984 |
| GQ356210 | KY620386 | MN628594 | OK553010 | OR497985 |
| GQ356211 | KY620387 | MN628595 | OK553011 | OR497986 |
| GQ356212 | KY620388 | MN628596 | OK553012 | OR497987 |
| GQ356213 | KY620389 | MN628597 | OK553013 | OR497988 |
| GQ356214 | KY620390 | MN782309 | OK553014 | OR497989 |
| GQ356215 | KY620391 | MN782310 | OK553015 | OR497990 |
| GQ356216 | KY620392 | MN782311 | OK553016 | OR497991 |
| GQ356217 | KY620393 | MN977326 | OK553017 | OR497992 |
| GU451218 | KY620394 | MN977327 | OK553018 | OR497993 |
| GU451219 | KY620395 | MN977328 | OK553019 | OR497994 |
| GU451220 | KY620396 | MN977329 | OK553020 | OR497995 |
| GU451221 | KY620397 | MT184369 | OK553021 | OR497997 |
| GU451222 | KY620398 | MT184370 | OK553022 | OR497998 |
| GU451223 | KY620399 | MT184371 | OK553023 | OR497999 |
| GU451224 | KY620400 | MT184372 | OK553024 | OR498000 |
| HM777358 | KY620401 | MT184373 | OK553025 | OR498002 |
| HM777359 | KY620402 | MT184374 | OK553026 | OR498004 |
| HQ110091 | KY620403 | MT185686 | OK553027 | OR498006 |
| HQ537005 | KY620404 | MT512570 | OK553028 | OR498007 |
| HQ537006 | KY620405 | MT632105 | OK553029 | OR498008 |
| HQ537007 | KY620406 | MT632106 | OK553031 | OR498012 |
| HQ537008 | KY620407 | MT632107 | OK553032 | OR498013 |
| HQ537009 | KY620408 | MT632108 | OK553033 | OR498015 |
| HQ719473 | KY620409 | MT632109 | OK553034 | OR498016 |
| HQ912953 | KY620410 | MT632110 | OK553035 | OR498017 |
| HQ912954 | KY620412 | MT632111 | OK553036 | OR498018 |
| HQ912955 | KY620413 | MT632112 | OK553037 | OR498019 |
| HQ912956 | KY620414 | MT632113 | OK553038 | OR498026 |
| HQ912957 | KY620415 | MT632114 | OK553039 | OR498028 |
| HQ912958 | KY620416 | MT632115 | OK553040 | OR498031 |
| HQ912959 | KY620417 | MT632116 | OK553041 | OR498033 |
| JF509175 | KY620418 | MT632117 | OK553042 | OR498036 |
| JF509176 | KY620419 | MT632118 | OK553043 | OR498039 |
| JF509177 | KY620420 | MT632119 | OK553044 | OR498041 |
| JN120912 | KY620422 | MT632120 | OK553045 | OR498043 |
| JN714194 | KY620423 | MT632121 | OK553046 | OR498044 |
| JQ061779 | KY620424 | MT632122 | OK553047 | OR498045 |
| JQ061781 | KY620426 | MT632123 | OK553048 | OR498046 |
| JQ061782 | KY620427 | MT632124 | OK553049 | OR498047 |
| JQ061783 | KY620428 | MT632126 | OK553050 | OR498048 |
| JQ061784 | KY620429 | MT632128 | OK553052 | OR498049 |
| JQ061785 | KY620430 | MT632129 | OK553053 | OR498050 |
| JQ061786 | KY620431 | MT632130 | OK553054 | OR498053 |
| JQ061787 | KY620432 | MT632131 | OK553055 | OR498054 |
| JQ065709 | KY620433 | MT632132 | OK553056 | OR498055 |
| JQ717254 | KY620434 | MT632133 | OK553057 | OR498056 |
| JQ717255 | KY620435 | MT632134 | OK553058 | OR498058 |
| JQ717256 | KY620436 | MT632135 | OK553059 | OR498059 |
| JQ717257 | KY620437 | MT632136 | OK553060 | OR498060 |
| JQ717258 | KY620438 | MT632137 | OK553061 | OR498064 |
| JQ717259 | KY620440 | MT632139 | OK553062 | OR498065 |
| JQ717260 | KY620441 | MT632140 | OK553063 | OR498067 |
| JQ745651 | KY620442 | MT632141 | OK553064 | OR498068 |
| JQ914271 | KY620443 | MT632142 | OK553065 | OR498069 |
| JQ914272 | KY620444 | MT632143 | OK553066 | OR594285 |
| JQ914273 | KY620446 | MT632144 | OK553067 | PP092205 |
| JQ914274 | KY620447 | MT632145 | OK553068 | PP092206 |
| JX463525 | KY620448 | MT632146 | OK553069 |  |
| JX463526 | KY620449 | MT632147 | OK553070 |  |
